# Supplementary material
Source: PubMed Central journal article supplement (PMC5451351)
Supplement: 2016_163451-Disclosures_and_Contributions.pdf [file 2016_163451-Disclosures_and_Contributions.pdf]

Haematologica  
HAEMATOL/2016/163451  
Version 3

Demystification of enigma on antigen presenting cell features of human  
basophils: data from secondary lymphoid organs

Emmanuel Stephen-Victor, Mrinmoy Das, Meenu Sharma, Caroline  
Galeotti, Hélène Fohrer-Ting, Boualem Sendid, Luc Darnige, Benoit  
Terris, Cécile Badoual, Patrick Bruneval, Srini V. Kaveri, and  
Jagadeesh Bayry

Disclosures: None

Contributions: ES-V, MD, MS, CG, HF-T performed experiments; ES-V, MD, MS, LD, PB, SVK, JB analyzed experimental data; BS, BT, CB and PB provided essential tools and materials for the research; JB wrote the paper; all authors revised and approved the manuscript critically for important intellectual content and approved the final version.
